# Supplementary material for: New insights into bioactive Ga(iii) hydroxyquinolinate complexes from UV-vis, fluorescence and multinuclear high-field NMR studies
Source: Royal Society of Chemistry journal article supplement (doi:10.1039/d5dt00087d), 2025-01-01
Supplement: d5dt00087d1.pdf [file d5dt00087d1.pdf]

## Electronic Supporting Information

### New insights into bioactive Ga(III) hydroxyquinolate complexes from UV-vis, fluorescence and multinuclear high-field NMR studies

Vanessa V. Gaensicke, Stephanie Bachmann, Luca Craciunescu, Andrew W. Prentice, Martin J. Paterson, Dinu Iuga, Peter J. Sadler\* and Rafael Cavalieri Marchi\*

#### Contents

|                                                                                                                                                                                                                                                                                                                  |           |
|------------------------------------------------------------------------------------------------------------------------------------------------------------------------------------------------------------------------------------------------------------------------------------------------------------------|-----------|
| <b>Table S1.</b> B3LYP and wB97X-D3 excitation/emission energies.                                                                                                                                                                                                                                                | <b>3</b>  |
| <b>Table S2.</b> B3LYP and $\omega$ B97X-D3 energy comparison of the <i>mer</i> - and <i>fac</i> -isomer of for [Ga(Br <sub>2</sub> -HQ) <sub>3</sub> ] in DMSO and vacuum [kJ/mol].                                                                                                                             | <b>4</b>  |
| <b>Figure S1.</b> 500 MHz (A) <sup>1</sup> H-NMR and (B) <sup>1</sup> H- <sup>1</sup> H NOESY in DMSO- <i>d</i> <sub>6</sub> of [Ga(HQ) <sub>3</sub> ].                                                                                                                                                          | <b>5</b>  |
| <b>Figure S2.</b> Emission intensity variation of the band at 550 nm as Ga(NO <sub>3</sub> ) <sub>3</sub> in water is titrated into Br <sub>2</sub> -HQH.                                                                                                                                                        | <b>6</b>  |
| <b>Figure S3.</b> (A) Changes in the UV-vis absorption spectra when Ga(NO <sub>3</sub> ) <sub>3</sub> in water is added into Br <sub>2</sub> -HQH solution. (B) Changes in the consumption band (341 nm) from Br <sub>2</sub> -HQH and the formation band (389 nm) from [Ga(Br <sub>2</sub> -HQ) <sub>3</sub> ]. | <b>7</b>  |
| <b>Figure S4.</b> Changes in the UV-vis absorption spectra when Ga(NO <sub>3</sub> ) <sub>3</sub> mol in water is added into Br <sub>2</sub> -HQ solution in DMSO.                                                                                                                                               | <b>8</b>  |
| <b>Figure S5.</b> UV-vis spectrum of Br <sub>2</sub> -HQH and synthesised [Ga(Br <sub>2</sub> -HQ) <sub>3</sub> ] in DMSO.                                                                                                                                                                                       | <b>9</b>  |
| <b>Figure S6.</b> FT-IR comparison of Br <sub>2</sub> -HQH and [Ga(Br <sub>2</sub> -HQ) <sub>3</sub> ] between 4000 to 450 cm <sup>-1</sup> .                                                                                                                                                                    | <b>10</b> |
| <b>Figure S7.</b> Observed (top) and theoretical (bottom) HR-MS of {[Ga(Br <sub>2</sub> -HQ) <sub>3</sub> ] + Na <sup>+</sup> } <sup>+</sup> .                                                                                                                                                                   | <b>11</b> |
| <b>Figure S8.</b> <sup>1</sup> H- <sup>1</sup> H NOESY spectra of (A) [Ga(Br <sub>2</sub> -HQ) <sub>3</sub> ] and (B) [Ga(HQ) <sub>3</sub> ] with mixing time of 5 ms. Spectra were recorded at 20 T with a 1.3 mm probe and a spinning speed of 60 kHz.                                                         | <b>12</b> |
| <b>Figure S9.</b> (A) <sup>13</sup> C CPMAS spectra of Br <sub>2</sub> -HQH at 10 kHz and 11 kHz. (B) <sup>13</sup> C CPMAS spectra of HQH at 10 kHz and 11 kHz.                                                                                                                                                 | <b>13</b> |

|                                                                                                                                                              |           |
|--------------------------------------------------------------------------------------------------------------------------------------------------------------|-----------|
| <b>Figure S10.</b> Lifetime decay of [Ga(Br <sub>2</sub> -HQ) <sub>3</sub> ] (1 μM) in DMSO with $\lambda_{\text{ex}} = 405$ nm.                             | <b>14</b> |
| <b>Figure S11.</b> Photostability of [Ga(Br <sub>2</sub> -HQH) <sub>3</sub> ] in DMSO under irradiation of blue light (420 nm).                              | <b>15</b> |
| <b>Figure S12.</b> [Ga(Br <sub>2</sub> -HQ) <sub>3</sub> ] UV-vis absorption spectrum calculated by DFT methods.                                             | <b>16</b> |
| <b>Figure S13.</b> Comparison of UV-Vis absorption spectra in DMSO calculated by DFT for [Ga(Br <sub>2</sub> -HQ) <sub>3</sub> ] and [Ga(HQ) <sub>3</sub> ]. | <b>17</b> |

**Table S1.** B3LYP and  $\omega$ B97X-D3 excitation/emission energies in DMSO for [Ga(Br<sub>2</sub>-HQ)<sub>3</sub>].

| Transition  | B3LYP       |                 | $\omega$ B97X-D3 |                 |
|-------------|-------------|-----------------|------------------|-----------------|
|             | Energy [eV] | Wavelength [nm] | Energy [eV]      | Wavelength [nm] |
| S1 vert Exc | 2.90        | 428             | 3.69             | 336             |
| S1 vert Em  | 2.05        | 605             | 2.81             | 442             |
| T1 vert Exc | 2.33        | 532             | 2.74             | 453             |
| T1 vert Em  | 1.64        | 758             | 1.60             | 774             |

**Table S2.** B3LYP and  $\omega$ B97X-D3 energy comparison of the *mer*- and *fac*-isomers of [Ga(Br<sub>2</sub>-HQ)<sub>3</sub>] in DMSO and vacuum (kJ/mol).

| Isomer     | B3LYP-D3<br>DMSO | B3LYP-D3<br>vac | $\omega$ B97X-D3<br>DMSO | $\omega$ B97X-D3<br>vac |
|------------|------------------|-----------------|--------------------------|-------------------------|
| <i>mer</i> | 0                | 0               | 0                        | 0                       |
| <i>fac</i> | 5.3              | 26.3            | 7.8                      | 30.8                    |

**A**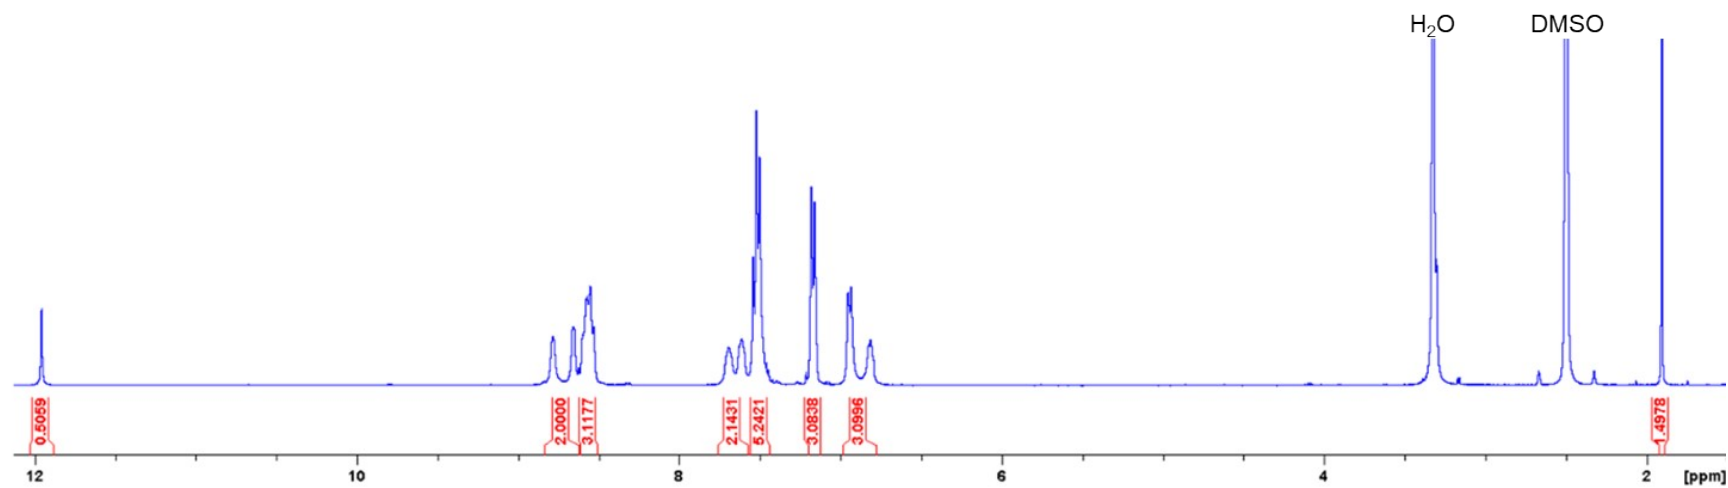**B**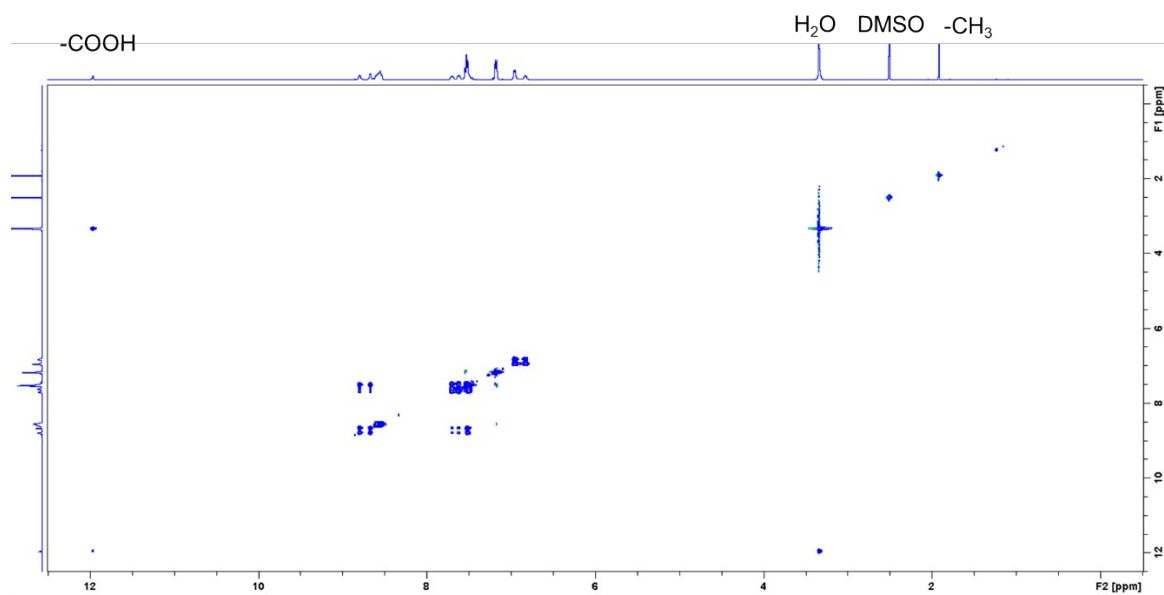

**Figure S1.** (A) 500 MHz <sup>1</sup>H-NMR spectrum of [Ga(HQ)<sub>3</sub>].0.5CH<sub>3</sub>COOH in DMSO-*d*<sub>6</sub> (B) 500 MHz <sup>1</sup>H-<sup>1</sup>H NOESY [Ga(HQ)].0.5CH<sub>3</sub>COOH NMR spectrum in DMSO-*d*<sub>6</sub>, mixing time 0.6 s.

The cross peak at 11.99/3.33 ppm is assigned to exchange between the -COOH of acetic acid and H<sub>2</sub>O.

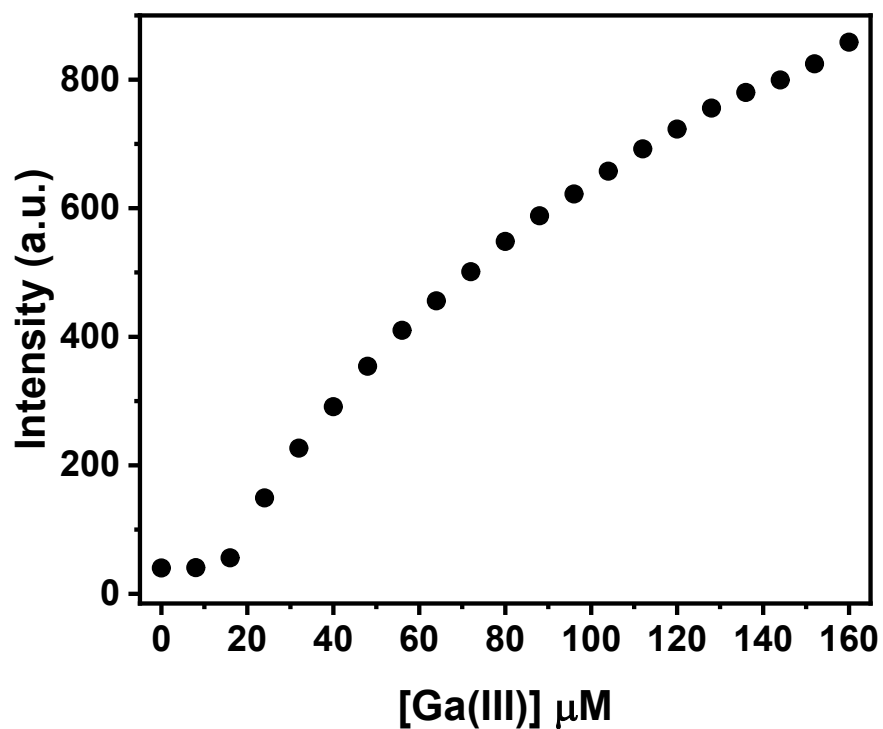

**Figure S2.** Variation of the intensity of emission at 550 nm on excitation at 400 nm with increasing Ga concentration on addition of aliquots of 0.6  $\mu\text{L}$   $\text{Ga}(\text{NO}_3)_3$  in water (0.065 mol equiv, 8  $\mu\text{M}$ ) to  $\text{Br}_2\text{-HQH}$  (1 mol equiv, 0.16 mM) in 99.6% DMSO/ 0.4% DMF (v/v). See Figure 2B.

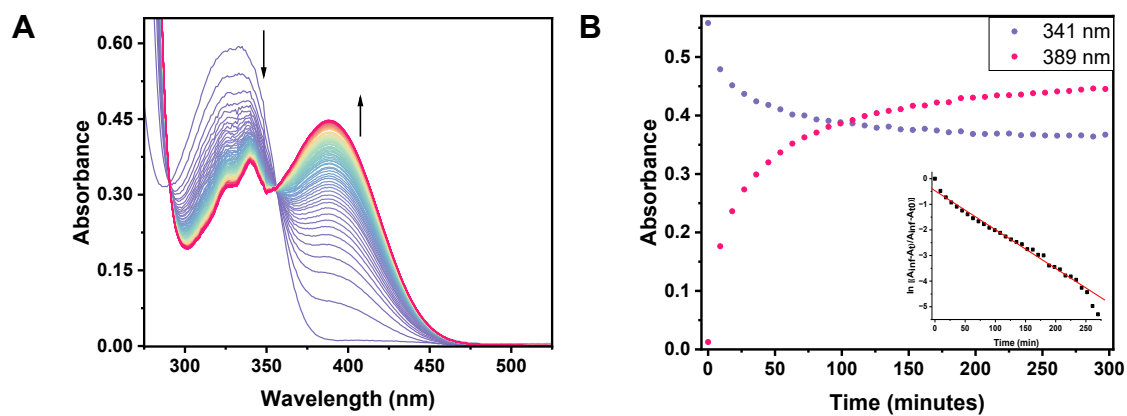

**Figure S3.** (A) Time-dependent changes in the UV-vis absorption spectrum after addition of  $\text{Ga}(\text{NO}_3)_3$  (0.67 mol equiv, 0.10 mM) in water to  $\text{Br}_2\text{-HQH}$  (1 mol equiv, 0.15 mM) solution in 99.6% DMSO/ 0.4% DMF (v/v). (B) Changes in absorbance at 341 nm from  $\text{Br}_2\text{-HQH}$  and the new band at 389 nm from  $[\text{Ga}(\text{Br}_2\text{-HQ})_3]$ . The inset shows the best fit of  $\log A$  vs. time (red line), giving the first-order rate constants in Table 1.

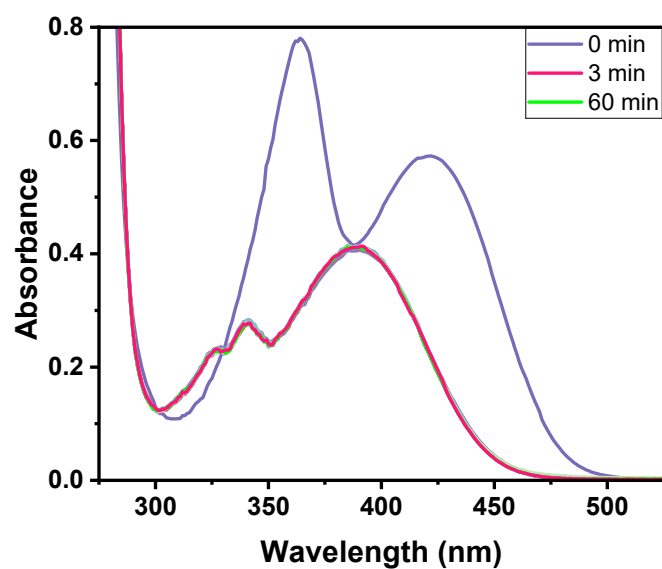

**Figure S4.** Time-dependent changes in the UV-vis absorption spectrum for Ga(NO<sub>3</sub>)<sub>3</sub> (0.33 mol equiv, 0.05 mM) in water after addition of Br<sub>2</sub>-HQ (1 mol equiv, 0.15 mM) in DMSO (0.4% DMF (v/v)).



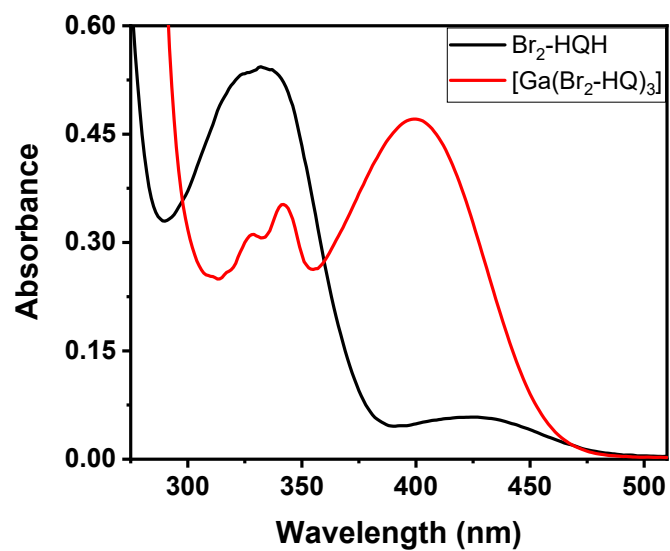

**Figure S5.** UV-vis spectra of  $\text{Br}_2\text{-HQH}$  (0.15 mM in 99.6% DMSO/ 0.4% DMF (v/v)) and synthesised  $[\text{Ga}(\text{Br}_2\text{-HQ})_3]$  (0.045 mM) in DMSO.

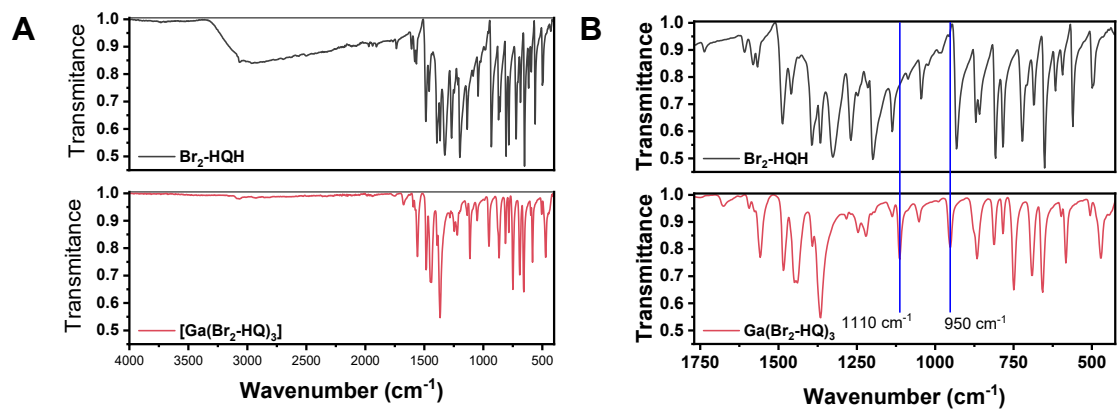

**Figure S6.** FT-IR comparison of Br<sub>2</sub>-HQH and [Ga(Br<sub>2</sub>-HQ)<sub>3</sub>] between (A) 4000 to 450 cm<sup>-1</sup>; the band assignable to the phenolic -OH disappears upon coordination. (B) Finger print region between 1800 to 450 cm<sup>-1</sup> where two new peaks at 950 and 1110 cm<sup>-1</sup> assignable to Ga(III)-O bonds appear.

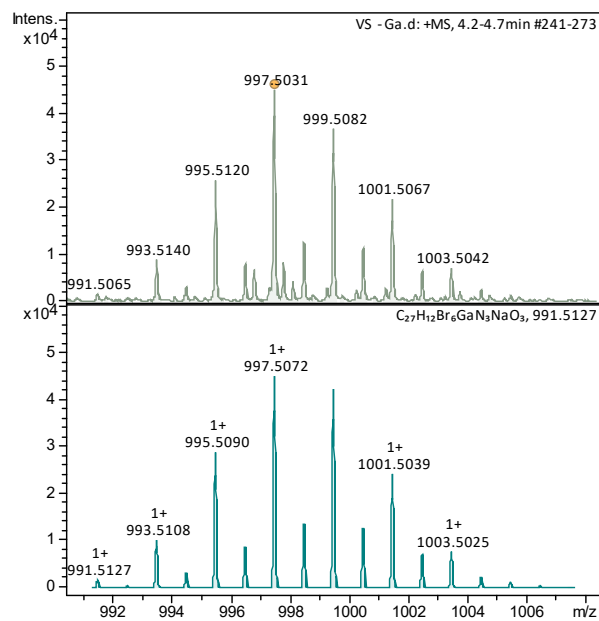

**Figure S7.** Observed (top) and calculated (bottom) HR-MS for  $\{[\text{Ga}(\text{Br}_2\text{-HQ})_3] + \text{Na}\}^+$

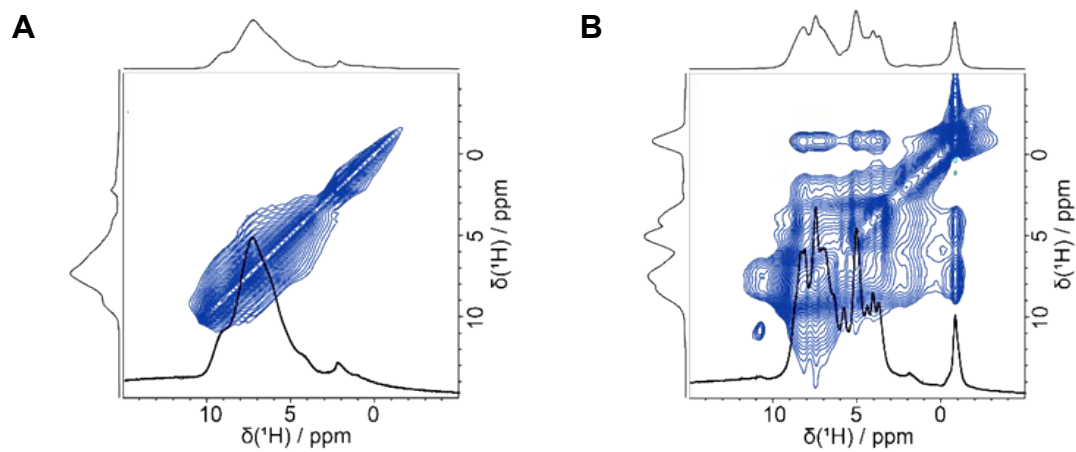

**Figure S8.** 850 MHz  $^1\text{H}$ - $^1\text{H}$  NOESY 2D solid state MAS NMR spectra of (A)  $[\text{Ga}(\text{Br}_2\text{-HQ})_3]$  and (B)  $[\text{Ga}(\text{HQ})_3] \cdot 0.5 \text{CH}_3\text{CO}_2\text{H}$  (mixing time of 5 ms).

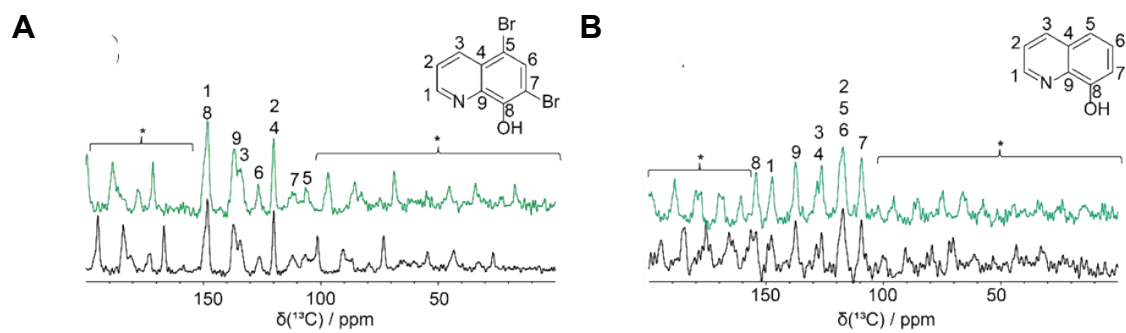

**Figure S9.**  $^{13}\text{C}$  CPMAS NMR spectra of  $\text{Br}_2\text{-HQH}$  (A) and HQH (B) at spinning rates at 10 kHz (black) and 11 kHz (green). Peaks assigned to the ligands have chemical shifts independent of spinning rate. \* = Spinning side bands.

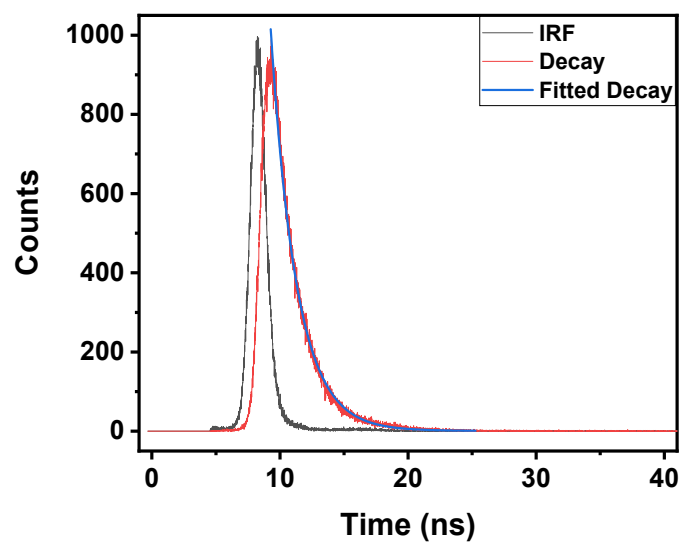

**Figure S10.** Lifetime decay of [Ga(Br<sub>2</sub>-HQ)<sub>3</sub>] (1 μM) in DMSO with  $\lambda_{\text{ex}}=405$  nm. The decay was fitted to a monoexponential function with decay constant of 1.32 ns.

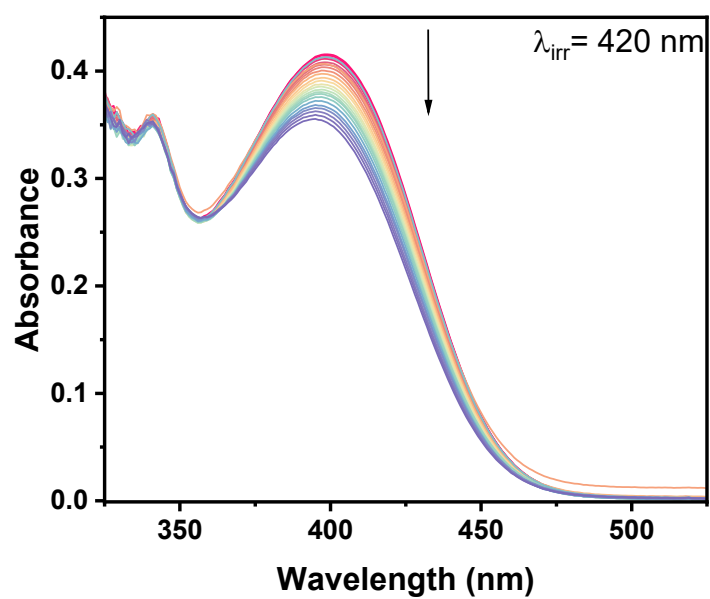

**Figure S11.** Photostability of [Ga(Br<sub>2</sub>-HQ)<sub>3</sub>] (0.03 mM) in DMSO under irradiation for 15 min using blue light (420 nm) followed by UV-vis spectroscopy. A decomposition of 13% was observed.

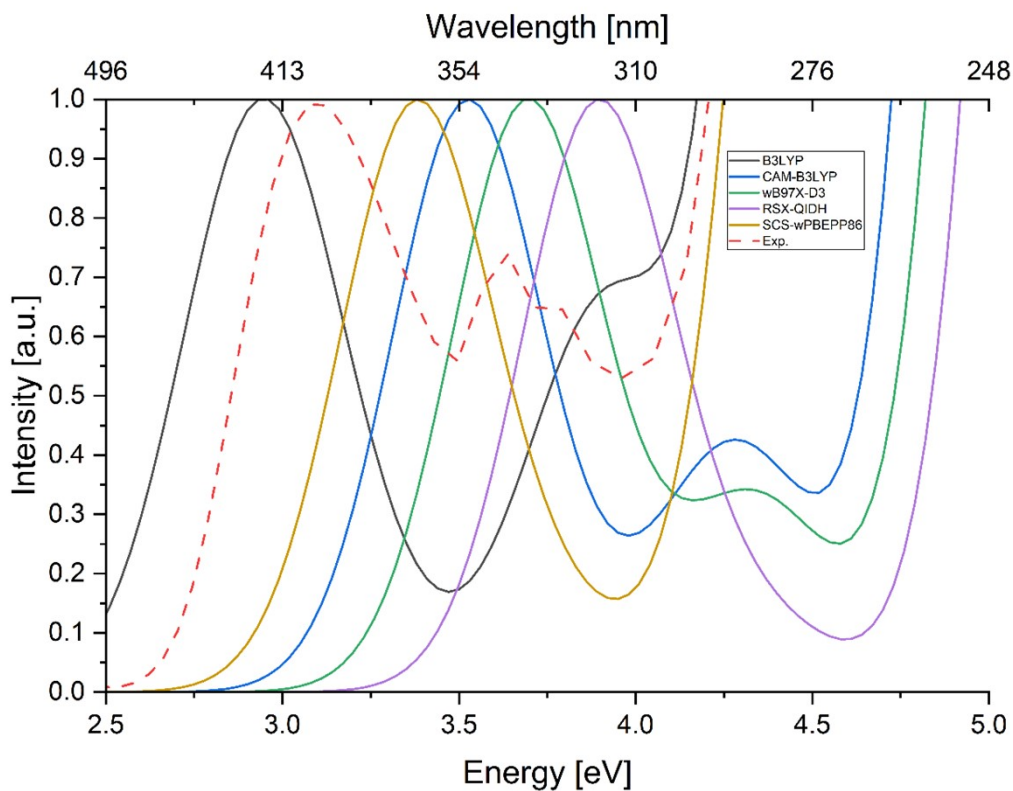

**Figure S12.** Comparison of the UV-vis absorption spectrum of  $[\text{Ga}(\text{Br}_2\text{-HQ})_3]$  in DMSO with those calculated using the DFT functionals B3LYP, CAM-B3LYP,  $\omega\text{B97X-D3}$ , RSX-QIDH and SCS- $\omega\text{PBEP86}$  (see section 2.11). While all functionals show the right intensity pattern of the experimental absorption spectrum, excitation energies vary, with B3LYP giving the best fit to experiment.



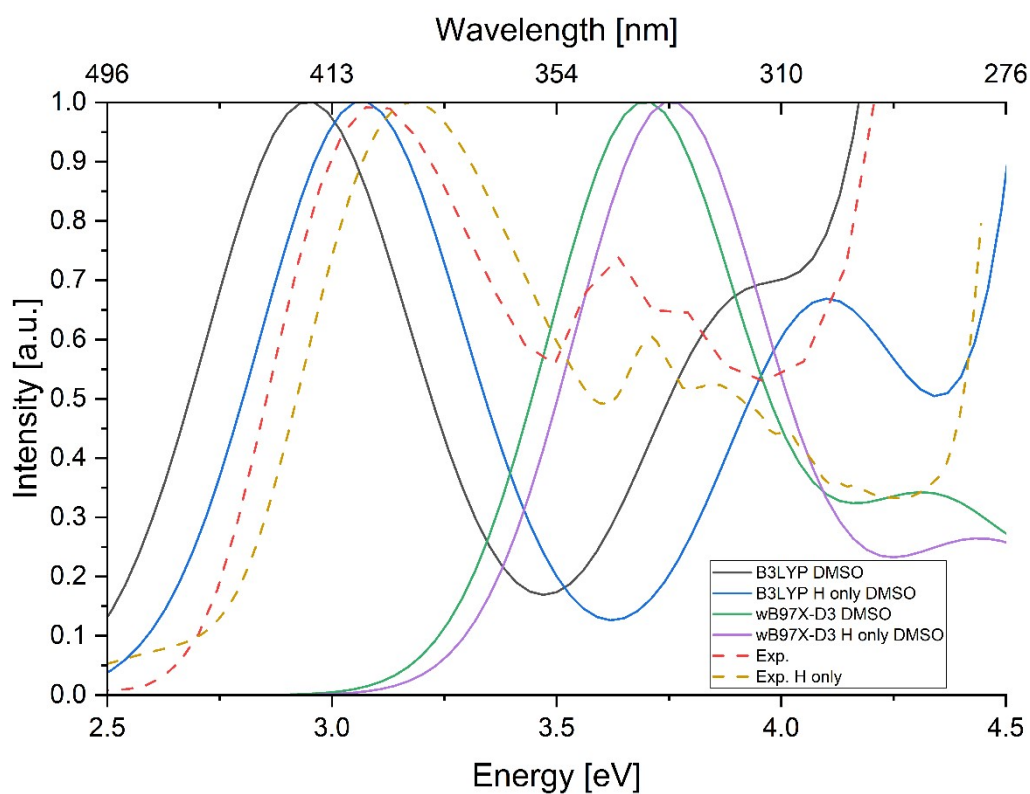

**Figure S13.** Comparison of the observed UV-vis absorption spectra for  $[\text{Ga}(\text{HQ})_3]$  (yellow hashed line) and  $[\text{Ga}(\text{Br}_2\text{-HQ})_3]$  (red hashed line) in DMSO with those calculated for  $[\text{Ga}(\text{Br}_2\text{-HQ})_3]$  using the B3LYP and  $\omega\text{B97X-D3}$  functionals. Both functionals reproduce the experimentally observed hypsochromic shift when replacing Br with H. Again, B3LYP is the best fit to experiment.
